# Supplementary material
Source: PubMed Central journal article supplement (PMC11115798)
Supplement: 18_2009_8767_MOESM1_ESM.pdf [file 18_2009_8767_MOESM1_ESM.pdf]

## Electronic supplementary material

### Supplemental Table

**Supplemental Table.** Candidate genes which were upregulated at least three-fold by EtBr- and CAP-induced mitochondrial dysfunction in HepG2 cells.

| EtBr (fold of control) | CAP (fold of control) | Gene name                                    | Gene symbol | PANTHER molecular function [50]                                 | PANTHER biological process                                                 |
|------------------------|-----------------------|----------------------------------------------|-------------|-----------------------------------------------------------------|----------------------------------------------------------------------------|
| 11.0                   | 20.8                  | Very low density lipoprotein receptor        | VLDLR       | Other receptor                                                  | Oogenesis                                                                  |
| 9.6                    | 3.0                   | Amphiregulin                                 | AREG        | Growth factor                                                   | Ligand-mediated signaling; Cell proliferation and differentiation          |
| 8.6                    | 4.5                   | Serpin peptidase inhibitor, member 2         | SERPINE2    | Serine protease inhibitor                                       | Proteolysis                                                                |
| 7.7                    | 4.2                   | Leukocyte-associated Ig-like receptor 2      | LAIR2       | Immunoglobulin receptor family member; Defense/immunity protein | Ligand-mediated signaling; Natural killer cell mediated immunity           |
| 7.4                    | 6.5                   | Early growth response 1                      | EGR1        | KRAB box transcription factor; Nucleic acid binding             | mRNA transcription regulation                                              |
| 5.7                    | 3.8                   | Vanin 1                                      | VNN1        | Other hydrolase                                                 | Vitamin metabolism                                                         |
| 5.5                    | 3.4                   | Aquaporin 7                                  | AQP7        | Other transporter                                               | Other transport; Other homeostasis activities                              |
| 5.1                    | 4.7                   | Insulin-like growth factor binding protein 1 | IGFBP1      | Other miscellaneous function protein                            | Extracellular matrix protein-mediated signaling; Growth factor homeostasis |
| 4.5                    | 5.4                   | Hexokinase domain containing 1               | HKDC1       | Carbohydrate kinase                                             | Glycolysis                                                                 |
| 4.2                    | 5.6                   | AXL receptor tyrosine kinase                 | AXL         | Tyrosine protein kinase receptor; Protein kinase                | Immunity and defense; Cell proliferation and differentiation; Oncogenesis  |
| 3.6                    | 4.9                   | Synaptogyrin 3                               | SYNGR3      | Membrane traffic regulatory protein                             | Neuronal activities                                                        |

## Supplemental Figures

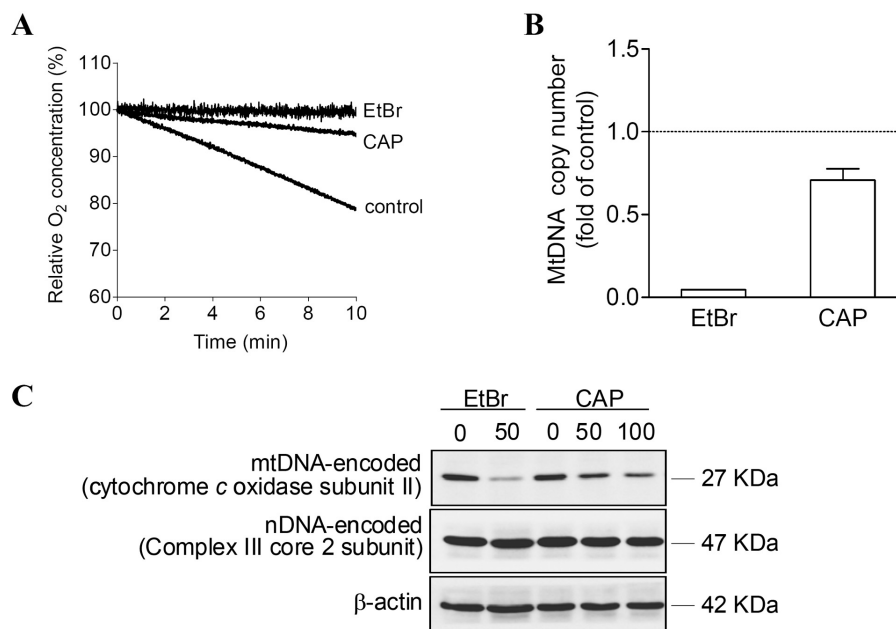

**Supplemental Figure 1.** Treatment of HepG2 cells with ethidium bromide (EtBr), and chloramphenicol (CAP) resulted in mitochondrial dysfunction. These treatments caused (A) decline in oxygen consumption, (B) depletion of mitochondrial DNA (mtDNA), (C) downregulation of mtDNA encoded cytochrome *c* oxidase subunit II, but not nuclear DNA encoded core 2 subunit of Complex III in HepG2 cells. The copy number of mtDNA was measured by  $\Delta$ Ct value of mitochondrial ND1/18S nDNA in genomic DNA. Data are the mean  $\pm$  SEM of the results from three independent experiments.

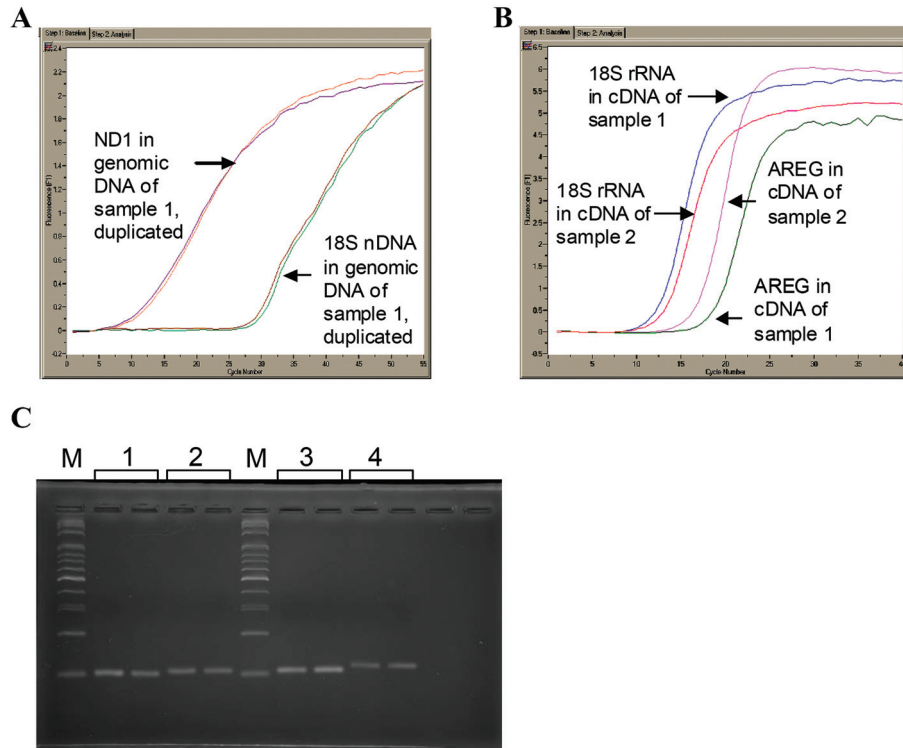

1. 18S nDNA in genomic DNA of sample 1
2. ND1 in genomic DNA of sample 1
3. 18S rRNA in cDNA of sample 1
4. AREG in cDNA of sample 1

**Supplemental Figure 2.** Validation of the real-time quantitative PCR in the measurement of the relative mtDNA copy number (A) and AR transcript in cDNA (B). The specificities of the ND1 and AR primers were demonstrated by RT-PCR (C).

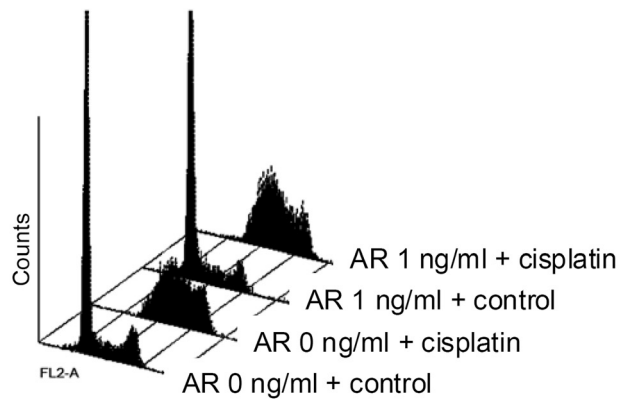

**Supplemental Figure 3.** The addition of recombinant AR had no effect on cisplatin-sensitivity of HepG2 cells. Human recombinant AR (0 and 1 ng/ml) was added to the culture medium 1 hr before treatment of cisplatin, and the HepG2 cells were then maintained in the medium containing cisplatin (0 or 10  $\mu$ M). After 36 h of incubation, the DNA content was measured by flow cytometry as described in Materials and methods.

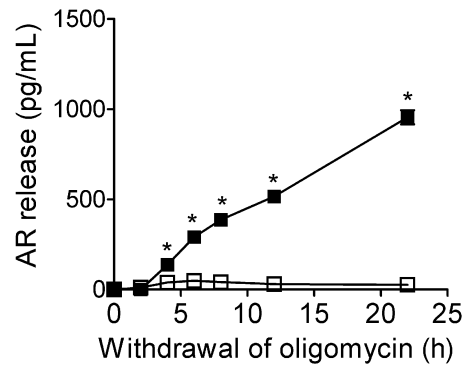

**Supplemental Figure 4.** Oligomycin induced AR release in a time-dependent manner. Cells had been cultured with the medium containing 0.5  $\mu\text{g}/\text{mL}$  oligomycin for 1 h, and were then washed thoroughly with a fresh medium. After incubation for indicated periods of time, AR concentration in the condition medium was measured by ELISA.
